# Supplementary material for: Molecular mechanisms of tungstate-induced pancreatic plasticity: a transcriptomics approach
Source: PubMed Central journal article supplement (PMC2741493; doi:10.1186/1471-2164-10-406), 2009-08-28
Supplement: 1471-2164-10-406-S1.pdf [file 1471-2164-10-406-S1.pdf]

# Differentially expressed genes in diabetic rats.

| Genes up-regulated in STZ-diabetes |                                                                                   |            |                             |
|------------------------------------|-----------------------------------------------------------------------------------|------------|-----------------------------|
| Probe set ID(affymetrix)           | Gene name                                                                         | Symbol     | Relative change in diabetes |
| <b>METABOLISM</b>                  |                                                                                   |            |                             |
| <b>Lipid metabolism</b>            |                                                                                   |            |                             |
| 1370310_at                         | 3-hydroxy-3-methylglutaryl-Coenzyme A synthase 2                                  | Hmgcs2     | 12.03                       |
| 1367777_at                         | 2,4-dienoyl CoA reductase 1, mitochondrial                                        | Decr1      | 7.55                        |
| 1386946_at                         | carnitine palmitoyltransferase 1a, liver                                          | Cpt1a      | 4.83                        |
| 1386885_at                         | enoyl coenzyme A hydratase 1, peroxisomal                                         | Ech1       | 3.36                        |
| 1367735_at                         | acetyl-Coenzyme A dehydrogenase, long-chain                                       | Acadl      | 3.06                        |
| 1370235_at                         | diazepam binding inhibitor                                                        | Dbi        | 2.56                        |
| 1370237_at                         | L-3-hydroxyacyl-Coenzyme A dehydrogenase, short chain                             | Hadhsc     | 2.53                        |
| 1367694_at                         | enoyl-Coenzyme A hydratase (trifunctional protein), beta subunit                  | Hadhb      | 2.16                        |
| 1368283_at                         | enoyl-Coenzyme A, hydratase/3-hydroxyacyl Coenzyme A dehydrogenase                | Ehhadh     | 2.08                        |
| 1386901_at                         | similar to fatty acid translocase/CD36                                            | RGD1562323 | 2.04                        |
| 1370164_at                         | enoyl-Coenzyme A hydratase (trifunctional protein), alpha subunit                 | Hadha      | 1.96                        |
| 1369150_at                         | pyruvate dehydrogenase kinase, isoenzyme 4                                        | Pdk4       | 1.86                        |
| 1386880_at                         | acetyl-Coenzyme A acyltransferase 2 (mitochondrial 3-oxoacyl-Coenzyme A thiolase) | Acaa2      | 1.73                        |
| 1367662_at                         | hydroxyacyl-Coenzyme A dehydrogenase type II                                      | Hadh2      | 1.67                        |
| 1367638_at                         | malonyl-CoA decarboxylase                                                         | Mlycd      | 1.62                        |
| 1373921_at                         | similar to enoyl Coenzyme A hydratase domain containing 3                         | LOC684538  | 1.57                        |
| 1367702_at                         | acetyl-Coenzyme A dehydrogenase, medium chain                                     | Acadm      | 1.56                        |
| 1367767_at                         | 3-hydroxy-3-methylglutaryl-Coenzyme A lyase                                       | Hmgcl      | 1.52                        |
| 1368717_at                         | fatty acid amide hydrolase                                                        | Faah       | 1.35                        |
| <b>Glucose metabolism</b>          |                                                                                   |            |                             |
| 1368622_at                         | fructose-1,6-bisphosphatase 2                                                     | Fbp2       | 2.63                        |
| 1368077_at                         | fructose-1,6-bisphosphatase 1                                                     | Fbp1       | 2.19                        |

| <b>Aminoacid metabolism</b> |                                                                                               |           |       |
|-----------------------------|-----------------------------------------------------------------------------------------------|-----------|-------|
| 1371303_at                  | L-threonine dehydrogenase                                                                     | Tdh       | 17.39 |
| 1370200_at                  | glutamate dehydrogenase 1                                                                     | Glud1     | 1.81  |
| <b>Other metabolisms</b>    |                                                                                               |           |       |
| 1373236_at                  | phosphopantothenoylcysteine decarboxylase                                                     | Ppcdc     | 5.87  |
| 1368037_at                  | carbonyl reductase 1                                                                          | Cbr1      | 5.23  |
| 1370806_at                  | all-trans-13,14-dihydroretinol saturase                                                       | Retsat    | 2.36  |
| 1371031_at                  | methionine adenosyltransferase I, alpha                                                       | Mat1a     | 2.28  |
| 1370180_at                  | nudix (nucleoside diphosphate linked moiety X)-type motif 4                                   | Nudt4     | 1.81  |
| 1389587_at                  | uridine monophosphate synthetase                                                              | Umps      | 1.45  |
| <b>NUCLEAR PROTEINS</b>     |                                                                                               |           |       |
| 1371521_at                  | similar to Paired amphipathic helix protein Sin3b (Histone deacetylase complex subunit Sin3b) | LOC683381 | 2.90  |
| 1367847_at                  | nuclear protein 1                                                                             | Nupr1     | 2.70  |
| 1371642_at                  | eukaryotic translation initiation factor 4A2                                                  | Eif4a2    | 1.96  |
| 1367798_at                  | S-adenosylhomocysteine hydrolase                                                              | Ahcy      | 1.94  |
| 1374731_at                  | Coilin                                                                                        | Coil      | 1.84  |
| 1398976_at                  | nuclear receptor co-repressor 1                                                               | Ncor1     | 1.64  |
| 1372242_at                  | DEAD/H (Asp-Glu-Ala-Asp/His) box polypeptide 3, X-linked                                      | Ddx3x     | 1.55  |
| 1367485_at                  | transcription elongation factor A (SII) 1                                                     | Tcea1     | 1.54  |
| 1398878_at                  | similar to CPSF4 protein                                                                      | MGC108785 | 1.51  |
| 1374954_at                  | histone deacetylase 11                                                                        | Hdac11    | 1.50  |
| 1370258_at                  | basic leucine zipper and W2 domains 2                                                         | Bzw2      | 1.42  |
| 1373748_at                  | PDZ domain containing RING finger 3                                                           | Pdzrn3    | 1.39  |
| 1389738_at                  | uracil-DNA glycosylase                                                                        | Ung       | 1.38  |
| 1388222_at                  | telomerase reverse transcriptase                                                              | Tert      | 1.38  |
| 1390573_a_at                | nuclear factor of activated T-cells, cytoplasmic, calcineurin-dependent 4                     | Nfatc4    | 1.36  |
| 1374636_at                  | PHD finger protein 17                                                                         | Phf17     | 1.35  |
| 1376023_at                  | similar to Retinoic acid receptor gamma-A (RAR-gamma-A)                                       | LOC683586 | 1.30  |
| <b>SIGNALLING</b>           |                                                                                               |           |       |
| 1387121_a_at                | N-myc downstream regulated gene 2                                                             | Ndrp2     | 2.73  |
| 1371817_at                  | similar to myo-inositol 1-phosphate synthase A1                                               | LOC290651 | 1.56  |

|                                             |                                                                          |                      |      |
|---------------------------------------------|--------------------------------------------------------------------------|----------------------|------|
| 1367675_at                                  | calcium and integrin binding 1 (calmyrin)                                | Cib1                 | 1.52 |
| 1374550_at                                  | similar to map kinase interacting kinase                                 | MGC112775            | 1.52 |
| 1369312_a_at                                | casein kinase 1, alpha 1                                                 | Csnk1a1              | 1.49 |
| 1389420_at                                  | signal-transducing adaptor protein-2                                     | Stap2                | 1.47 |
| 1387342_at                                  | guanine nucleotide binding protein (G protein), gamma 5 subunit          | Gng5                 | 1.43 |
| 1371994_at                                  | Rho GTPase activating protein 1                                          | Arhgap1              | 1.35 |
| 1398821_s_at                                | myosin light chain kinase 2, skeletal muscle                             | Mylk2                | 1.27 |
| <b>PROTEIN MODIFICATION AND DEGRADATION</b> |                                                                          |                      |      |
| 1388924_at                                  | angiopoietin-like 4                                                      | Angptl4              | 3.17 |
| 1372536_at                                  | chaperone, ABC1 activity of bc1 complex like (S. pombe)                  | Cabc1                | 1.78 |
| 1368446_at                                  | serine protease inhibitor, Kazal type 1                                  | Spink1               | 1.68 |
| 1387669_a_at                                | epoxide hydrolase 1, microsomal                                          | Ephx1                | 1.63 |
| 1388470_at                                  | F-box only protein 9                                                     | Fbxo9                | 1.53 |
| 1376035_at                                  | tetratricopeptide repeat domain 7B (predicted)                           | Ttc7b_predicted      | 1.52 |
| 1398848_at                                  | suppression of tumorigenicity 13                                         | St13                 | 1.48 |
| <b>TRANSPORT / TRAFFICKING</b>              |                                                                          |                      |      |
| 1371782_at                                  | nipsnap homolog 3A (C. elegans)                                          | Nipsnap3a            | 1.81 |
| 1386937_at                                  | ATPase, Na <sup>+</sup> /K <sup>+</sup> transporting, beta 1 polypeptide | Atp1b1               | 1.70 |
| 1368418_a_at                                | ceruloplasmin                                                            | Cp                   | 1.65 |
| 1387578_a_at                                | purinergic receptor P2X, ligand-gated ion channel, 2                     | P2rx2                | 1.55 |
| 1376874_a_at                                | adaptor-related protein complex AP-4, beta 1                             | Ap4b1                | 1.53 |
| 1389622_at                                  | similar to citrin                                                        | RGD1565889           | 1.45 |
| 1367789_at                                  | solute carrier family 27 (fatty acid transporter), member 1              | Slc27a1              | 1.40 |
| 1374347_at                                  | CDK5 regulatory subunit associated protein 1-like 1                      | Cdkal1               | 1.40 |
| 1390440_at                                  | solute carrier family 9 (sodium/hydrogen exchanger), member 6            | Slc9a6               | 1.38 |
| 1374692_at                                  | Sorting nexin 14                                                         | Snx14                | 1.33 |
| <b>OXIDATIVE STRESS</b>                     |                                                                          |                      |      |
| 1367576_at                                  | glutathione peroxidase 1                                                 | Gpx1                 | 3.74 |
| 1371942_at                                  | similar to Glutathione S-transferase, theta 3 (predicted)                | RGD1562732_predicted | 2.05 |
| 1389253_at                                  | vanin 1                                                                  | Vnn1                 | 1.96 |
| 1398378_at                                  | glutathione S-transferase kappa 1                                        | Gstk1                | 1.94 |

| <b>PHOSPHATASES</b>                 |                                                                 |           |      |
|-------------------------------------|-----------------------------------------------------------------|-----------|------|
| 1392467_at                          | inositol (myo)-1(or 4)-monophosphatase 2                        | Impa2     | 3.45 |
| 1370193_at                          | protein tyrosine phosphatase 4a1                                | Ptp4a1    | 2.22 |
| 1369961_at                          | phosphatidic acid phosphatase 2a                                | Ppap2a    | 1.62 |
| 1373479_at                          | Protein phosphatase 3, catalytic subunit, alpha isoform         | Ppp3ca    | 1.40 |
| 1388502_at                          | inositol polyphosphate-5-phosphatase B                          | Inpp5b    | 1.37 |
| <b>CELL CYCLE / GROWTH</b>          |                                                                 |           |      |
| 1371131_a_at                        | thioredoxin interacting protein                                 | Txnip     | 5.96 |
| 1375420_at                          | tumor protein p53 inducible protein 11                          | Tp53i11   | 3.63 |
| 1367830_a_at                        | tumor protein p53                                               | Tp53      | 1.71 |
| 1388953_at                          | guanine nucleotide binding protein-like 3 (nucleolar)           | Gnl3      | 1.45 |
| 1372052_at                          | budding uninhibited by benzimidazoles 3 homolog (S. cerevisiae) | Bub3      | 1.45 |
| 1372133_at                          | related RAS viral (r-ras) oncogene homolog 2                    | Rras2     | 1.40 |
| 1376195_at                          | spindlin                                                        | Spin      | 1.36 |
| <b>APOPTOSIS / DEFENSE RESPONSE</b> |                                                                 |           |      |
| 1398326_at                          | similar to Nur77 downstream protein 2                           | MGC105647 | 1.73 |
| 1398784_at                          | complement component 1, q subcomponent binding protein          | C1qbp     | 1.58 |
| 1387805_at                          | BCL2/adenovirus E1B 19 kDa-interacting protein 3                | Bnip3     | 1.40 |
| <b>HORMONES</b>                     |                                                                 |           |      |
| 1367762_at                          | somatostatin                                                    | Sst       | 2.54 |
| <b>EXOCRINE ENZYMES</b>             |                                                                 |           |      |
| 1371092_at                          | preprotrypsinogen IV                                            | LOC286960 | 8.06 |
| <b>MEMBRANE</b>                     |                                                                 |           |      |
| 1388393_at                          | proteolipid protein 2                                           | Plp2      | 1.99 |
| 1379429_at                          | Transmembrane emp24 protein transport domain containing 5       | Tmed5     | 1.56 |
| 1375904_at                          | Transmembrane emp24 protein transport domain containing 5       | Tmed5     | 1.56 |
| 1373058_at                          | transmembrane protein 30A                                       | Tmem30a   | 1.52 |
| 1372369_at                          | transmembrane protein 109                                       | Tmem109   | 1.41 |
| 1367746_a_at                        | flotillin 2                                                     | Flot2     | 1.41 |
| <b>STRUCTURAL</b>                   |                                                                 |           |      |

|                           |                                                       |                      |      |
|---------------------------|-------------------------------------------------------|----------------------|------|
| 1389533_at                | fibulin 2                                             | Fbln2                | 1.49 |
| <b>MITOCHONDRIA</b>       |                                                       |                      |      |
| 1372457_at                | mitochondrial tumor suppressor 1                      | Mtus1                | 1.78 |
| 1389125_at                | mitochondrial ribosomal protein L1 (predicted)        | Mrpl1_predicted      | 1.45 |
| <b>ELECTRON TRANSPORT</b> |                                                       |                      |      |
| 1388358_at                | electron-transfer-flavoprotein, beta polypeptide      | Etfb                 | 1.82 |
| 1371253_at                | electron transferring flavoprotein, alpha polypeptide | Etfa                 | 1.71 |
| 1368336_at                | ferredoxin 1                                          | Fdx1                 | 1.69 |
| 1371519_at                | electron-transferring-flavoprotein dehydrogenase      | Etfdh                | 1.64 |
| 1367705_at                | glutaredoxin 1 (thioltransferase)                     | Glrx1                | 1.39 |
| 1370005_at                | cytochrome b5 type B                                  | Cyb5b                | 1.39 |
| <b>OTHERS</b>             |                                                       |                      |      |
| 1373898_at                | similar to PABP-dependent poly(A) nuclease 3          | LOC360760            | 1.64 |
| 1372688_at                | exosome component 7                                   | Exosc7               | 1.33 |
| <b>ESTS</b>               |                                                       |                      |      |
| 1390249_at                | similar to DKFZP434H132 protein                       | RGD1305464           | 7.78 |
| 1372372_at                | similar to Ab2-225                                    | RGD1306952           | 2.38 |
| 1399001_at                | hypothetical LOC294030                                | RGD1305481           | 2.26 |
| 1373778_at                | Transcribed locus                                     |                      | 2.07 |
| 1374816_at                | similar to hypothetical protein FLJ30973              | LOC363091            | 1.92 |
| 1377460_at                | EST                                                   |                      | 1.89 |
| 1371445_at                | leucine rich repeat containing 59                     | Lrrc59               | 1.70 |
| 1371976_at                | hypothetical protein LOC682248                        | LOC682248            | 1.68 |
| 1371854_at                | EST                                                   |                      | 1.65 |
| 1367494_at                | similar to CGI-35 protein (predicted)                 | RGD1310899_predicted | 1.56 |
| 1372027_at                | Transcribed locus                                     |                      | 1.54 |
| 1372843_at                | LOC363020 (predicted)                                 | RGD1309410_predicted | 1.52 |
| 1374194_at                | EST                                                   |                      | 1.50 |
| 1375934_at                | similar to RIKEN cDNA D330045A20 (predicted)          | RGD1566282_predicted | 1.50 |
| 1371856_at                | CDNA clone MGC:93828 IMAGE:7110880                    |                      | 1.50 |
| 1388739_at                | similar to chromosome 14 open reading frame 130       | RGD1359144           | 1.48 |

|            |                                                                                     |                      |      |
|------------|-------------------------------------------------------------------------------------|----------------------|------|
| 1388887_at | Transcribed locus                                                                   |                      | 1.47 |
| 1371631_at | similar to 2010003J03Rik protein                                                    | RGD1304686           | 1.45 |
| 1376034_at | similar to mKIAA0738 protein (predicted)                                            | RGD1565474_predicted | 1.44 |
| 1373497_at | Transcribed locus                                                                   |                      | 1.43 |
| 1373033_at | similar to chromosome 6 open reading frame 83; similar to RIKEN cDNA 5630401J11     | MGC105508            | 1.43 |
| 1373334_at | similar to RIKEN cDNA 0610039G24 gene (predicted)                                   | RGD1310828_predicted | 1.43 |
| 1388579_at | similar to alternative testis transcripts open reading frame A CG4241-PA, isoform A | LOC684597            | 1.42 |
| 1385866_at | Transcribed locus                                                                   |                      | 1.42 |
| 1373922_at | Transcribed locus                                                                   |                      | 1.41 |
| 1390288_at | EST                                                                                 |                      | 1.36 |
| 1374090_at | similar to DKFZP547E1010 protein                                                    | LOC361990            | 1.35 |

### Genes down-regulated in STZ-diabetes

| Probe set ID (affymetrix)   | Gene name                                                             | Symbol | Relative change in diabetes |
|-----------------------------|-----------------------------------------------------------------------|--------|-----------------------------|
| <b>METABOLISM</b>           |                                                                       |        |                             |
| <b>Lipid metabolism</b>     |                                                                       |        |                             |
| 1367887_at                  | lecithin cholesterol acyltransferase                                  | Lcat   | -4.09                       |
| 1368453_at                  | fatty acid desaturase 2                                               | Fads2  | -1.81                       |
| 1388148_a_at                | low density lipoprotein receptor-related protein associated protein 1 | Lrpap1 | -1.76                       |
| 1388190_at                  | apolipoprotein B                                                      | Apob   | -1.72                       |
| 1373053_at                  | Similar to Acyl-CoA-binding protein (ACBP)                            |        | -1.71                       |
| 1368016_at                  | peroxisomal trans-2-enoyl-CoA reductase                               | Pecr   | -1.46                       |
| 1372443_at                  | low density lipoprotein receptor-related protein 11                   | Lrp11  | -1.40                       |
| <b>Aminoacid metabolism</b> |                                                                       |        |                             |
| 1387034_at                  | phenylalanine hydroxylase                                             | Pah    | -1.83                       |

|                          |                                                       |           |       |
|--------------------------|-------------------------------------------------------|-----------|-------|
| 1372741_at               | saccharopine dehydrogenase (putative)                 | Sccpdh    | -1.34 |
| <b>Other metabolisms</b> |                                                       |           |       |
| 1387022_at               | aldehyde dehydrogenase family 1, member A1            | Aldh1a1   | -2.44 |
| 1367999_at               | aldehyde dehydrogenase 2                              | Aldh2     | -1.53 |
| 1373222_at               | hexosaminidase A                                      | Hexa      | -1.53 |
| 1387339_at               | selenoprotein P, plasma, 1                            | Sepp1     | -1.45 |
| 1369863_at               | alcohol dehydrogenase 4 (class II), pi polypeptide    | Adh4      | -1.35 |
| 1388330_at               | vitamin K epoxide reductase complex, subunit 1        | Vkorc1    | -1.35 |
| <b>NUCLEAR PROTEINS</b>  |                                                       |           |       |
| 1371959_at               | histone cluster 2, H2aa                               | Hist2h2aa | -3.72 |
| 1373860_at               | SRY-box containing gene 4                             | Sox4      | -2.03 |
| 1390021_at               | histone cluster 1, H2bh                               | Hist1h2bh | -1.91 |
| 1368376_at               | nuclear receptor subfamily 0, group B, member 2       | Nr0b2     | -1.74 |
| 1374600_at               | histone cluster 1, H4b                                | Hist1h4b  | -1.66 |
| 1383065_at               | nicolin 1                                             | Nicn1     | -1.42 |
| 1387278_at               | peroxisome proliferator activated receptor alpha      | Ppara     | -1.40 |
| 1370386_at               | RuvB-like protein 1                                   | Ruvbl1    | -1.39 |
| 1369085_s_at             | small nuclear ribonucleoprotein N                     | Snrpn     | -1.38 |
| 1369728_at               | similar to germinal histone H4 gene                   | LOC680097 | -1.30 |
| <b>SIGNALLING</b>        |                                                       |           |       |
| 1398296_at               | membrane interacting protein of RGS16                 | Mir16     | -2.97 |
| 1370150_a_at             | thyroid hormone responsive protein                    | Thrsp     | -2.77 |
| 1387671_at               | secretin receptor                                     | Sctr      | -2.10 |
| 1368884_at               | ectonucleoside triphosphate diphosphohydrolase 1      | Entpd1    | -1.70 |
| 1370842_at               | branched chain ketoacid dehydrogenase kinase          | Bckdk     | -1.70 |
| 1368523_at               | Ca <sup>2+</sup> -dependent secretion activator       | Cadps     | -1.68 |
| 1367905_at               | ectonucleotide pyrophosphatase/phosphodiesterase 3    | Enpp3     | -1.64 |
| 1370948_a_at             | myristoylated alanine rich protein kinase C substrate | LOC294446 | -1.60 |
| 1369855_at               | histamine receptor H 1                                | Hrh1      | -1.58 |
| 1398298_at               | 5-hydroxytryptamine (serotonin) receptor 1D           | Htr1d     | -1.54 |
| 1371158_at               | Eph receptor A8                                       | Epha8     | -1.49 |

|                                             |                                                                                                                 |           |       |
|---------------------------------------------|-----------------------------------------------------------------------------------------------------------------|-----------|-------|
| 1375566_at                                  | angiotensin II, type I receptor-associated protein                                                              | Agtrap    | -1.46 |
| 1373365_at                                  | cytidylate kinase                                                                                               | Cmpk      | -1.46 |
| 1369230_at                                  | gamma-aminobutyric acid (GABA-C) receptor, subunit rho 2                                                        | Gabbr2    | -1.43 |
| <b>PROTEIN MODIFICATION AND DEGRADATION</b> |                                                                                                                 |           |       |
| 1369286_at                                  | protein C                                                                                                       | Proc      | -2.46 |
| 1388699_at                                  | mannosidase 2, alpha B1                                                                                         | Man2b1    | -2.39 |
| 1371615_at                                  | diacylglycerol O-acyltransferase homolog 2 (mouse)                                                              | Dgat2     | -2.39 |
| 1372421_at                                  | aspartylglucosaminidase                                                                                         | Aga       | -2.05 |
| 1387131_at                                  | serine (or cysteine) peptidase inhibitor, clade I, member 1                                                     | Serpini1  | -2.03 |
| 1376249_at                                  | fucosidase, alpha-L- 2, plasma                                                                                  | Fuca2     | -1.96 |
| 1367835_at                                  | proprotein convertase subtilisin/kexin type 1 inhibitor                                                         | Pcsk1n    | -1.85 |
| 1392798_at                                  | protein disulfide isomerase associated 2                                                                        | Pdia2     | -1.78 |
| 1387155_at                                  | proprotein convertase subtilisin/kexin type 2                                                                   | Pcsk2     | -1.74 |
| 1372706_at                                  | hexosaminidase B                                                                                                | Hexb      | -1.72 |
| 1386938_at                                  | alanyl (membrane) aminopeptidase                                                                                | Anpep     | -1.71 |
| 1374790_at                                  | N-acetylglucosamine-1-phosphotransferase, gamma subunit                                                         | Gnptg     | -1.68 |
| 1371358_at                                  | glycoprotein, synaptic 2                                                                                        | Gpsn2     | -1.67 |
| 1372504_at                                  | similar to dolichyl-phosphate mannosyltransferase polypeptide 3 (Dolichol-phosphate mannose synthase subunit 3) | LOC684429 | -1.57 |
| 1388643_at                                  | fucosyltransferase 8 (alpha (1,6) fucosyltransferase)                                                           | Fut8      | -1.39 |
| 1391272_at                                  | similar to WAP four-disulfide core 6-like 1                                                                     | LOC684696 | -1.36 |
| 1389833_at                                  | Sulfatase modifying factor 1                                                                                    | Sumf1     | -1.34 |
| 1368281_at                                  | dipeptidase 1 (renal)                                                                                           | Dpep1     | -1.34 |
| <b>TRANSPORT / TRAFFICKING</b>              |                                                                                                                 |           |       |
| 1368044_at                                  | secretogranin 2                                                                                                 | Scg2      | -6.95 |
| 1387228_at                                  | solute carrier family 2 (facilitated glucose transporter), member 2                                             | Slc2a2    | -3.68 |
| 1368316_at                                  | aquaporin 8                                                                                                     | Aqp8      | -2.90 |
| 1369999_a_at                                | neuronatin                                                                                                      | Nnat      | -2.13 |
| 1369769_at                                  | potassium voltage-gated channel, Isk-related subfamily, member 1                                                | Kcne1     | -1.84 |
| 1374427_at                                  | Synaptotagmin XIII                                                                                              | Syt13     | -1.57 |
| 1367877_at                                  | solute carrier family 11 (proton-coupled divalent metal ion transporters), member 2                             | Slc11a2   | -1.49 |
| 1376413_at                                  | Amyloid beta (A4) precursor protein-binding, family A, member 1                                                 | Apba1     | -1.43 |



|                                     |                                                                                                          |                     |        |
|-------------------------------------|----------------------------------------------------------------------------------------------------------|---------------------|--------|
| 1371889_at                          | solute carrier family 22 (organic cation transporter), member 17                                         | Slc22a17            | -1.37  |
| 1368343_at                          | potassium voltage-gated channel, subfamily H (eag-related), member 2                                     | Kcnh2               | -1.36  |
| <b>OXIDATIVE STRESS</b>             |                                                                                                          |                     |        |
| 1367917_at                          | cytochrome P450, family 2, subfamily d, polypeptide 26                                                   | Cyp2d26             | -2.49  |
| 1368023_at                          | quiescin Q6                                                                                              | Qscn6               | -2.18  |
| 1388122_at                          | glutathione-S-transferase, pi 1 /// glutathione S-transferase, pi 2                                      | Gstp1 /// Gstp2     | -1.96  |
| 1386940_at                          | tissue inhibitor of metalloproteinase 2                                                                  | Timp2               | -1.90  |
| 1368514_at                          | monoamine oxidase B                                                                                      | Maob                | -1.72  |
| 1373043_at                          | stromal cell-derived factor 2-like 1 (predicted)                                                         | Sdf2l1              | -1.70  |
| 1375357_at                          | dystonia 1                                                                                               | Dyt1                | -1.51  |
| 1368265_at                          | cytochrome P450 monooxygenase CYP2T1                                                                     | Cyp2t1              | -1.49  |
| 1371249_at                          | X-box binding protein 1                                                                                  | Xbp1                | -1.48  |
| 1387305_s_at                        | cytochrome P450, family 11, subfamily B, polypeptide 2 /// cytochrome P450, subfamily 11B, polypeptide 1 | Cyp11b1 /// Cyp11b2 | -1.34  |
| <b>PHOSPHATASES</b>                 |                                                                                                          |                     |        |
| 1386968_at                          | protein phosphatase 1, regulatory (inhibitor) subunit 1A                                                 | Ppp1r1a             | -1.86  |
| 1370182_at                          | protein tyrosine phosphatase, receptor type, N polypeptide 2                                             | Ptprn2              | -1.40  |
| 1388805_at                          | Protein phosphatase 2 (formerly 2A), catalytic subunit, alpha isoform                                    | Ppp2ca              | -1.40  |
| 1388048_a_at                        | inositol polyphosphate-4-phosphatase, type II                                                            | Inpp4b              | -1.29  |
| <b>CELL CYCLE / GROWTH</b>          |                                                                                                          |                     |        |
| 1376073_at                          | Sel1 (suppressor of lin-12) 1 homolog                                                                    | Sel1h               | -2.06  |
| 1374357_at                          | CDC91 cell division cycle 91-like 1                                                                      | Cdc91l1             | -1.37  |
| <b>APOPTOSIS / DEFENSE RESPONSE</b> |                                                                                                          |                     |        |
| 1370027_a_at                        | alpha-1-inhibitor III                                                                                    | LOC297568           | -9.05  |
| 1388229_a_at                        | Murinoglobulin 1 homolog (mouse)                                                                         | Mug1                | -4.45  |
| 1369953_a_at                        | CD24 antigen                                                                                             | Cd24                | -2.83  |
| 1389762_at                          | similar to Fc fragment of IgG binding protein                                                            | RGD1311906          | -2.37  |
| 1370243_a_at                        | prothymosin alpha                                                                                        | Ptma                | -1.69  |
| 1369879_a_at                        | testis enhanced gene transcript                                                                          | Tegt                | -1.63  |
| <b>HORMONES</b>                     |                                                                                                          |                     |        |
| 1370077_at                          | insulin 2                                                                                                | Ins2                | -25.73 |

|                         |                                                                           |            |        |
|-------------------------|---------------------------------------------------------------------------|------------|--------|
| 1387815_at              | insulin 1                                                                 | Ins1       | -7.72  |
| 1387660_at              | islet amyloid polypeptide                                                 | Iapp       | -4.39  |
| 1367904_at              | regulated endocrine-specific protein 18                                   | Resp18     | -2.17  |
| 1368312_at              | oxytocin                                                                  | Oxt        | -1.52  |
| <b>EXOCRINE ENZYMES</b> |                                                                           |            |        |
| 1370359_at              | amylase 1, salivary                                                       | Amy1       | -68.66 |
| 1369503_at              | amylase 2, pancreatic                                                     | Amy2       | -29.37 |
| 1390326_at              | angiogenin, ribonuclease A family, member 1                               | Ang1       | -2.89  |
| 1386921_at              | carboxypeptidase E                                                        | Cpe        | -3.78  |
| 1387503_at              | carboxypeptidase N, polypeptide 1, 50kD                                   | Cpn1       | -1.41  |
| <b>MEMBRANE</b>         |                                                                           |            |        |
| 1398325_at              | tetraspanin 3                                                             | Tspan3     | -2.25  |
| 1387135_at              | a disintegrin and metallopeptidase domain 15 (metargidin)                 | Adam15     | -1.58  |
| 1372780_at              | transmembrane protein 53                                                  | Tmem53     | -1.37  |
| <b>MITOCHONDRIA</b>     |                                                                           |            |        |
| 1375788_at              | Ribosomal protein L7                                                      | Rpl7       | -2.37  |
| 1398946_at              | similar to mitochondrial ribosomal protein S16                            | LOC683012  | -1.44  |
| <b>STRUCTURAL</b>       |                                                                           |            |        |
| 1368113_at              | trefoil factor 2 (spasmolytic protein 1)                                  | Tff2       | -40.39 |
| 1388793_at              | phosphatidylinositol glycan, class Q                                      | Pigq       | -1.54  |
| 1374399_at              | EH-domain containing 4                                                    | Ehd4       | -1.50  |
| 1387844_at              | LIM and SH3 protein 1                                                     | Lasp1      | -1.42  |
| 1368367_at              | CUB and zona pellucida-like domains 1                                     | Cuzd1      | -1.42  |
| <b>OTHERS</b>           |                                                                           |            |        |
| 1388723_at              | brain and reproductive organ-expressed protein                            | Bre        | -1.55  |
| 1378983_at              | Similar to translin-associated factor X (Tsnax) interacting protein 1     | RGD1565341 | -1.49  |
| 1373438_at              | ubiquitin-conjugating enzyme E2O                                          | Ube2o      | -1.44  |
| 1374287_at              | paladin                                                                   | Pald       | -1.40  |
| <b>ESTS</b>             |                                                                           |            |        |
| 1388985_at              | Transcribed locus, moderately similar to NP_001020173.1 protein LOC310926 |            | -3.97  |

|              |                                                                                          |                      |       |
|--------------|------------------------------------------------------------------------------------------|----------------------|-------|
| 1381975_at   | Similar to KIAA0367                                                                      | RGD1311350           | -2.27 |
| 1373908_at   | EST                                                                                      |                      | -1.93 |
| 1373114_at   | Transcribed locus                                                                        |                      | -1.81 |
| 1385507_at   | Transcribed locus                                                                        |                      | -1.80 |
| 1383165_at   | EST                                                                                      |                      | -1.79 |
| 1390153_at   | Transcribed locus                                                                        |                      | -1.74 |
| 1388447_at   | similar to limb-bud and heart                                                            | LOC683626            | -1.74 |
| 1383162_at   | EST                                                                                      |                      | -1.73 |
| 1376861_at   | similar to RIKEN cDNA 1810018L05                                                         | LOC317312            | -1.68 |
| 1374124_at   | similar to RIKEN cDNA 2610003J06                                                         | RGD1307381           | -1.60 |
| 1383161_a_at | EST                                                                                      |                      | -1.59 |
| 1389905_at   | EST                                                                                      |                      | -1.56 |
| 1368226_at   | Nucleoside 2-deoxyribosyltransferase domain containing protein RGD620382                 | RGD620382            | -1.55 |
| 1390733_at   | WW domain-containing oxidoreductase (predicted)                                          | Wwox_predicted       | -1.55 |
| 1371399_at   | hypothetical protein LOC681123                                                           | LOC681123            | -1.53 |
| 1377753_at   | Par-6 partitioning defective 6 homolog gamma ( <i>C. elegans</i> ) (predicted)           | Pard6g_predicted     | -1.50 |
| 1371663_at   | similar to expressed sequence AW556797 (predicted)                                       | RGD1305138_predicted | -1.48 |
| 1389395_at   | Transcribed locus                                                                        |                      | -1.44 |
| 1377199_at   | EST                                                                                      |                      | -1.41 |
| 1377773_at   | Transcribed locus, weakly similar to NP_766020.1 cDNA C030002O17 [ <i>Mus musculus</i> ] |                      | -1.41 |
| 1375708_at   | EST                                                                                      |                      | -1.40 |
| 1392784_at   | EST                                                                                      |                      | -1.39 |
| 1371298_at   | CDNA clone IMAGE:7460165                                                                 |                      | -1.39 |
| 1371881_at   | zinc finger, HIT domain containing 2                                                     | Znhit2               | -1.39 |
| 1370947_at   | hypothetical protein RDA279                                                              | Rda279               | -1.38 |
| 1371597_at   | ring finger protein 187 (predicted)                                                      | Rnf187_predicted     | -1.36 |
| 1376391_at   | Transcribed locus                                                                        |                      | -1.34 |
| 1371468_at   | similar to RAB11 family interacting protein 5 (class I) isoform 1                        | LOC312502            | -1.32 |
| 1388402_at   | similar to 2410001H17Rik protein (predicted)                                             | RGD1305824_predicted | -1.31 |
| 1375648_at   | similar to hypothetical protein                                                          | RGD1307966           | -1.30 |
| 1375116_at   | Hypothetical protein LOC690771                                                           | LOC690771            | -1.29 |
