# Supplementary material for: Molecular mechanisms of tungstate-induced pancreatic plasticity: a transcriptomics approach
Source: PubMed Central journal article supplement (PMC2741493; doi:10.1186/1471-2164-10-406), 2009-08-28
Supplement: 1471-2164-10-406-S2.pdf [file 1471-2164-10-406-S2.pdf]

# Differentially expressed genes in diabetic treated rats.

| Genes up-regulated in treated diabetic rats |                                                                         |           |                 |         |
|---------------------------------------------|-------------------------------------------------------------------------|-----------|-----------------|---------|
| Probe set ID(affymetrix)                    | Gene name                                                               | Symbol    | Relative change |         |
|                                             |                                                                         |           | DT vs DU        | DT vs H |
| <b>METABOLISM</b>                           |                                                                         |           |                 |         |
| <b>Aminoacid metabolism</b>                 |                                                                         |           |                 |         |
| 1389785_at                                  | aspartoacylase (aminoacylase) 3                                         | Acy3      | 1.91            | 1.81    |
| 1387034_at                                  | phenylalanine hydroxylase                                               | Pah       | 1.90            | 1.04    |
| 1368344_at                                  | glutamic acid decarboxylase 1                                           | Gad1      | 1.80            | 1.32    |
| 1377375_at                                  | aminoadipate-semialdehyde synthase                                      | Aass      | 1.52            | -1.01   |
| <b>Other metabolisms</b>                    |                                                                         |           |                 |         |
| 1371774_at                                  | spermidine/spermine N1-acetyl transferase                               | Sat       | 2.88            | 2.86    |
| <b>NUCLEAR PROTEINS</b>                     |                                                                         |           |                 |         |
| 1371959_at                                  | histone cluster 2, H2aa                                                 | Hist2h2aa | 2.41            | -1.55   |
| 1368376_at                                  | nuclear receptor subfamily 0, group B, member 2                         | Nr0b2     | 1.81            | 1.04    |
| 1374600_at                                  | histone cluster 1, H4b                                                  | Hist1h4b  | 1.55            | -1.07   |
| <b>SIGNALLING</b>                           |                                                                         |           |                 |         |
| 1379281_at                                  | uterine sensitization-associated protein-1                              | Usag-1    | 2.17            | 1.45    |
| 1367905_at                                  | ectonucleotide pyrophosphatase/phosphodiesterase 3                      | Enpp3     | 1.73            | 1.06    |
| 1398298_at                                  | 5-hydroxytryptamine (serotonin) receptor 1D                             | Htr1d     | 1.61            | 1.05    |
| 1368705_at                                  | endothelial differentiation, sphingolipid G-protein-coupled receptor, 8 | Edg8      | 1.50            | 1.28    |
| <b>PROTEIN MODIFICATION AND DEGRADATION</b> |                                                                         |           |                 |         |
| 1373381_at                                  | hect domain and RLD 4                                                   | Herc4     | 6.45            | 4.02    |
| 1386938_at                                  | alanyl (membrane) aminopeptidase                                        | Anpep     | 2.96            | 1.73    |
| 1388680_at                                  | C1GALT1-specific chaperone 1                                            | C1galt1c1 | 1.74            | 1.33    |
| 1368281_at                                  | dipeptidase 1 (renal)                                                   | Dpep1     | 1.59            | 1.19    |
| 1368131_at                                  | calpain 6                                                               | Capn6     | 1.56            | 1.26    |
| 1369286_at                                  | protein C                                                               | Proc      | 1.42            | -1.73   |
| 1368430_at                                  | legumain                                                                | Lgmn      | 1.40            | 1.53    |

| <b>TRANSPORT / TRAFFICKING</b>      |                                                                                             |                 |       |       |
|-------------------------------------|---------------------------------------------------------------------------------------------|-----------------|-------|-------|
| 1368316_at                          | aquaporin 8                                                                                 | Aqp8            | 2.27  | -1.28 |
| 1376709_at                          | solute carrier family 39 (metal ion transporter), member 8                                  | Slc39a8         | 1.80  | 1.40  |
| 1369769_at                          | potassium voltage-gated channel, Isk-related subfamily, member 1                            | Kcne1           | 1.66  | -1.11 |
| 1372710_at                          | blocked early in transport 1 homolog ( <i>S. cerevisiae</i> )                               | Bet1            | 1.41  | 1.35  |
| 1388163_at                          | solute carrier family 25 (mitochondrial carrier; adenine nucleotide translocator), member 5 | Slc25a5         | 1.40  | 1.39  |
| <b>OXIDATIVE STRESS</b>             |                                                                                             |                 |       |       |
| 1367917_at                          | cytochrome P450, family 2, subfamily d, polypeptide 26                                      | Cyp2d26         | 2.63  | 1.06  |
| 1368023_at                          | quiescin Q6                                                                                 | Qscn6           | 1.94  | -1.12 |
| 1388122_at                          | glutathione-S-transferase, pi 1 /// glutathione S-transferase, pi 2                         | Gstp1 /// Gstp2 | 1.90  | -1.03 |
| 1371249_at                          | X-box binding protein 1                                                                     | Xbp1            | 1.75  | 1.18  |
| 1398857_at                          | surfeit 1                                                                                   | Surf1           | 1.49  | 1.04  |
| <b>CELL CYCLE / GROWTH</b>          |                                                                                             |                 |       |       |
| 1367859_at                          | transforming growth factor, beta 3                                                          | Tgfb3           | 2.37  | 1.82  |
| 1369953_a_at                        | CD24 antigen                                                                                | Cd24            | 2.37  | -1.19 |
| 1376073_at                          | Sel1 (suppressor of lin-12) 1 homolog                                                       | Sel1h           | 2.24  | 1.09  |
| 1368114_at                          | fibroblast growth factor 13                                                                 | Fgf13           | 2.23  | 1.49  |
| 1373043_at                          | stromal cell-derived factor 2-like 1                                                        | Sdf2l1          | 1.98  | 1.17  |
| 1371360_at                          | N-myc downstream regulated gene 1                                                           | Ndrg1           | 1.52  | 1.29  |
| <b>APOPTOSIS / DEFENSE RESPONSE</b> |                                                                                             |                 |       |       |
| 1370243_a_at                        | prothymosin alpha                                                                           | Ptma            | 1.39  | -1.21 |
| <b>MEMBRANE</b>                     |                                                                                             |                 |       |       |
| 1368052_at                          | tetraspanin 8                                                                               | Tspan8          | 2.78  | 2.41  |
| 1388545_at                          | SPARC-related modular calcium binding protein 1                                             | Smoc1           | 2.02  | 2.24  |
| <b>EXOCRINE ENZYMES</b>             |                                                                                             |                 |       |       |
| 1369503_at                          | amylase 2, pancreatic                                                                       | Amy2            | 26.21 | -1.12 |
| 1370359_at                          | amylase 1, salivary                                                                         | Amy1            | 15.67 | -4.38 |
| 1390326_at                          | angiogenin, ribonuclease A family, member 1                                                 | Ang1            | 2.39  | -1.21 |
| 1368943_at                          | ribonuclease, RNase A family 4                                                              | Rnase4          | 1.83  | 1.38  |
| 1370880_at                          | ribonuclease/angiogenin inhibitor 1                                                         | Rnh1            | 1.32  | 1.14  |

| <b>STRUCTURAL</b> |                                                                                        |                      |       |       |
|-------------------|----------------------------------------------------------------------------------------|----------------------|-------|-------|
| 1368113_at        | trefoil factor 2 (spasmolytic protein 1)                                               | Tff2                 | 30.67 | -1.32 |
| 1368367_at        | CUB and zona pellucida-like domains 1                                                  | Cuzd1                | 1.70  | 1.19  |
| 1368099_at        | CLIP associating protein 2                                                             | Clasp2               | 1.40  | 1.43  |
| <b>OTHERS</b>     |                                                                                        |                      |       |       |
| 1389654_at        | Plastin 1                                                                              | Pls1_predicted       | 1.58  | 1.29  |
| <b>ESTS</b>       |                                                                                        |                      |       |       |
| 1375052_at        | similar to nuclear localized factor 2                                                  | LOC501015            | 3.97  | 3.54  |
| 1389762_at        | similar to Fc fragment of IgG binding protein                                          | RGD1311906           | 2.56  | 1.08  |
| 1383606_at        | membrane targeting (tandem) C2 domain containing 1                                     | Mtac2d1              | 1.56  | 2.05  |
| 1374349_at        | CTD (carboxy-terminal domain, RNA polymerase II, polypeptide A) small phosphatase-like | Ctdspl_predicted     | 1.54  | 1.32  |
| 1388900_at        | RGD1566118 (predicted)                                                                 | RGD1566118_predicted | 1.54  | 1.29  |
| 1389732_at        | Similar to CG4025-PA                                                                   | LOC679937            | 1.49  | 1.51  |
| 1373705_at        | similar to 39S ribosomal protein L28, mitochondrial precursor (L28mt) (MRP-L28)        | LOC497876            | 1.40  | 1.17  |
| 1372642_at        | Transcribed locus                                                                      |                      | 1.28  | 1.44  |

| <b>Genes down-regulated in treated diabetic rats</b> |                                                       |        |                 |          |
|------------------------------------------------------|-------------------------------------------------------|--------|-----------------|----------|
| Probe set ID(affymetrix)                             | Gene name                                             | Symbol | Relative change |          |
|                                                      |                                                       |        | DT vs DU        | DT vs HU |
| <b>METABOLISM</b>                                    |                                                       |        |                 |          |
| <b>Lipid metabolism</b>                              |                                                       |        |                 |          |
| 1370310_at                                           | 3-hydroxy-3-methylglutaryl-Coenzyme A synthase 2      | Hmgcs2 | -11.81          | 1.02     |
| 1367777_at                                           | 2,4-dienoyl CoA reductase 1, mitochondrial            | Decr1  | -4.96           | 1.52     |
| 1386885_at                                           | enoyl coenzyme A hydratase 1, peroxisomal             | Ech1   | -3.35           | 1.00     |
| 1370237_at                                           | L-3-hydroxyacyl-Coenzyme A dehydrogenase, short chain | Hadhsc | -2.72           | -1.08    |
| 1367735_at                                           | acetyl-Coenzyme A dehydrogenase, long-chain           | Acadl  | -2.44           | 1.25     |

|                                             |                                                                                               |            |        |       |
|---------------------------------------------|-----------------------------------------------------------------------------------------------|------------|--------|-------|
| 1386901_at                                  | similar to fatty acid translocase/CD36                                                        | RGD1562323 | -2.14  | -1.05 |
| 1367694_at                                  | hydroxyacyl-Coenzyme A dehydrogenase                                                          | Hadhb      | -1.96  | 1.10  |
| 1368283_at                                  | enoyl-Coenzyme A, hydratase/3-hydroxyacyl Coenzyme A dehydrogenase                            | Ehhadh     | -1.85  | 1.13  |
| <b>Glucose metabolism</b>                   |                                                                                               |            |        |       |
| 1368622_at                                  | fructose-1,6-bisphosphatase 2                                                                 | Fbp2       | -2.75  | -1.04 |
| 1368077_at                                  | fructose-1,6-bisphosphatase 1                                                                 | Fbp1       | -2.07  | 1.06  |
| <b>Aminoacid metabolism</b>                 |                                                                                               |            |        |       |
| 1371303_at                                  | L-threonine dehydrogenase                                                                     | Tdh        | -31.68 | -1.82 |
| <b>Other metabolisms</b>                    |                                                                                               |            |        |       |
| 1373236_at                                  | phosphopantothoenoylcysteine decarboxylase                                                    | Ppcdc      | -6.32  | -1.08 |
| 1368037_at                                  | carbonyl reductase 1                                                                          | Cbr1       | -4.52  | 1.16  |
| 1370806_at                                  | all-trans-13,14-dihydroretinol saturase                                                       | Retsat     | -2.98  | -1.27 |
| <b>NUCLEAR PROTEINS</b>                     |                                                                                               |            |        |       |
| 1371521_at                                  | similar to Paired amphipathic helix protein Sin3b (Histone deacetylase complex subunit Sin3b) | LOC683381  | -2.25  | 1.29  |
| <b>SIGNALLING</b>                           |                                                                                               |            |        |       |
| 1389420_at                                  | signal-transducing adaptor protein-2                                                          | Stap2      | -1.39  | 1.06  |
| <b>PROTEIN MODIFICATION AND DEGRADATION</b> |                                                                                               |            |        |       |
| 1388924_at                                  | angiopoietin-like 4                                                                           | Angptl4    | -3.37  | -1.06 |
| 1372536_at                                  | chaperone, ABC1 activity of bc1 complex like                                                  | Cabc1      | -2.06  | -1.15 |
| <b>TRANSPORT / TRAFFICKING</b>              |                                                                                               |            |        |       |
| 1368418_a_at                                | ceruloplasmin                                                                                 | Cp         | -1.42  | 1.17  |
| <b>OXIDATIVE STRESS</b>                     |                                                                                               |            |        |       |
| 1389253_at                                  | vanin 1                                                                                       | Vnn1       | -2.30  | -1.18 |
| 1371942_at                                  | similar to Glutathione S-transferase, theta 3                                                 | RGD1562732 | -2.15  | -1.05 |
| <b>PHOSPHATASES</b>                         |                                                                                               |            |        |       |
| 1392467_at                                  | inositol (myo)-1(or 4)-monophosphatase 2                                                      | Impa2      | -3.21  | 1.07  |
| <b>CELL CYCLE / GROWTH</b>                  |                                                                                               |            |        |       |
| 1371131_a_at                                | thioredoxin interacting protein                                                               | Txnip      | -4.56  | 1.31  |
| 1386891_at                                  | Raf kinase inhibitory protein                                                                 | Rkip       | -1.59  | -1.29 |

| <b>OTHERS</b> |                                                                               |                      |       |       |
|---------------|-------------------------------------------------------------------------------|----------------------|-------|-------|
| 1368000_at    | complement component 3                                                        | C3                   | -1.32 | 1.00  |
| <b>ESTS</b>   |                                                                               |                      |       |       |
| 1390249_at    | similar to DKFZP434H132 protein                                               | RGD1305464           | -5.57 | 1.40  |
| 1372372_at    | similar to Ab2-225                                                            | RGD1306952           | -3.40 | -1.43 |
| 1377460_at    | EST                                                                           |                      | -1.88 | 1.01  |
| 1371922_at    | Transcribed locus                                                             |                      | -1.54 | -1.25 |
| 1373898_at    | similar to PABP-dependent poly(A) nuclease 3                                  | LOC360760            | -1.42 | 1.16  |
| 1373117_at    | ubiquitin-like, containing PHD and RING finger domains 2 (predicted)          | Uhrf2_predicted      | -1.36 | -1.06 |
| 1377208_at    | Transcribed locus                                                             |                      | -1.35 | -1.07 |
| 1376931_at    | similar to Hepatocellular carcinoma-associated antigen 58 homolog (predicted) | RGD1305020_predicted | -1.32 | -1.07 |
