# Supplementary material for: Molecular mechanisms of tungstate-induced pancreatic plasticity: a transcriptomics approach
Source: PubMed Central journal article supplement (PMC2741493; doi:10.1186/1471-2164-10-406), 2009-08-28
Supplement: 1471-2164-10-406-S4.pdf [file 1471-2164-10-406-S4.pdf]

# Genes selected for checking.

|               | Why these genes are selected?                                                                                                                                                                                                                                                                                                                                                                                                                                                      | Pathway                                                          | References                                                                                                                                                                                                                                                                                                                                                                             |
|---------------|------------------------------------------------------------------------------------------------------------------------------------------------------------------------------------------------------------------------------------------------------------------------------------------------------------------------------------------------------------------------------------------------------------------------------------------------------------------------------------|------------------------------------------------------------------|----------------------------------------------------------------------------------------------------------------------------------------------------------------------------------------------------------------------------------------------------------------------------------------------------------------------------------------------------------------------------------------|
| <b>Rkip</b>   | <ul style="list-style-type: none"> <li>In the pancreas, localizes specifically in the islets</li> <li>Controls beta cell proliferation</li> <li>RKIP binds to Raf-1, leading to the blockage of Mek and Erk activation</li> <li>Tungstate activates the classical MAPK pathway (Ras-&gt;Raf-&gt;Mek-&gt;Erk) in hepatocytes</li> </ul>                                                                                                                                             | MAPK<br>p42/44                                                   | <ul style="list-style-type: none"> <li>Surgery 136:708-715</li> <li>J Biol Chem 278:42785-42794</li> </ul>                                                                                                                                                                                                                                                                             |
| <b>Fgf13</b>  | <ul style="list-style-type: none"> <li>Fgf13 binds to islet-brain 2, recruiting p38<math>\delta</math>, and increasing the activity of this kinase</li> <li>Tungstate increases the phosphorylation of p38 in the islets of nSTZ-rats</li> </ul>                                                                                                                                                                                                                                   | MAPK p38                                                         | <ul style="list-style-type: none"> <li>J Biol Chem 277:49111-49119</li> <li>Diabetologia 47:470-477</li> </ul>                                                                                                                                                                                                                                                                         |
| <b>Tspn8</b>  | <ul style="list-style-type: none"> <li>Tetraspanin 8 may exert tumor-promoting activities through an increase in cell motility and by inducing angiogenesis</li> <li>STZ damage provokes a reduction in islet capillary area and severe microcirculatory disturbances within pancreatic islets</li> </ul>                                                                                                                                                                          |                                                                  | <ul style="list-style-type: none"> <li>Am J Physiol 273:E376-E382</li> <li>Cancer Res 66:7083-7094</li> </ul>                                                                                                                                                                                                                                                                          |
| <b>Usag-1</b> | <ul style="list-style-type: none"> <li>Inhibits or increases Wnt signaling depending on the context and inhibits BMP signaling</li> <li>Controls the cell fate of cells in the kidney, tooth and hair</li> <li>Wnt and BMP signaling have been demonstrated to be essential for the development and regeneration of the pancreas</li> </ul>                                                                                                                                        | Wnt<br><br>BMP                                                   | <ul style="list-style-type: none"> <li>Development. 130:4295-305</li> <li>Cytokine Growth Factor Rev. 16:309-17</li> <li>Kidney Int. 73:181-91</li> <li>Science. 309:2067-70</li> <li>Proc Natl Acad Sci U S A. 102:14653-8</li> <li>Proc Natl Acad Sci U S A. 104:6247-52</li> <li>BMC Dev Biol. 7:4</li> <li>Gastroenterology. 134:544-55</li> <li>J Cell Sci. 115:753-60</li> </ul> |
| <b>Tgfb3</b>  | <ul style="list-style-type: none"> <li>Controls epithelial mesenchymal transformation, mesenchymal proliferation and angiogenesis during mouse palate development</li> <li>Regulates neuron differentiation and blood-testis barrier dynamics through the Sertoli junctions</li> <li>Other members of the TGF family have biological activities that also control adhesion, proliferation, and differentiation, which are important processes for pancreas regeneration</li> </ul> | Tgf-beta                                                         | <ul style="list-style-type: none"> <li>Plast Reconstr Surg 108:938-948</li> <li>J Cell Biol. 163:1291-301</li> <li>Birth Defects Res A Clin Mol Teratol. 73:956-65</li> <li>Stem Cells. 24:2120-9</li> <li>Biol Reprod. 68:1597-612</li> <li>Annu Rev Biochem. 67:753-91</li> <li>Science 306:2261-2264</li> <li>Mol. Endocrinol 21:1467-477</li> </ul>                                |
| <b>Xbp1</b>   | <ul style="list-style-type: none"> <li>Key role in the unfolded protein response</li> <li>Xbp1 knockout animals display abnormalities exclusively in secretory organs such as exocrine pancreas which lead to early postnatal lethality</li> </ul>                                                                                                                                                                                                                                 | UPR<br>(Unfolding protein response)                              | <ul style="list-style-type: none"> <li>Mol Cell Biol 23:7448-7459</li> <li>EMBO J 24:4368-80</li> </ul>                                                                                                                                                                                                                                                                                |
| <b>Sel1h</b>  | <ul style="list-style-type: none"> <li>Present in the acini and the islet in the pancreas</li> <li>Implicated in beta-cell growth</li> <li>Inhibits Notch pathway</li> <li>Can modulate the TGFbeta pathway</li> <li>Both pathways, TGFbeta and Notch pathway, can control the cell fate and are essential for the pancreas development</li> </ul>                                                                                                                                 | UPR<br>(Unfolding protein response)<br><br>Notch<br><br>Tgf-beta | <ul style="list-style-type: none"> <li>Oncogene 22:6359-68</li> <li>DNA Cell Biol. 23:510-518</li> <li>FEBS Lett. 581:5355-60</li> <li>Res Commun Mol Pathol Pharmacol. 102:265-72</li> <li>Am J Pathol 169:1206-1214</li> </ul>                                                                                                                                                       |
