# Supplementary material for: Molecular mechanisms of tungstate-induced pancreatic plasticity: a transcriptomics approach
Source: PubMed Central journal article supplement (PMC2741493; doi:10.1186/1471-2164-10-406), 2009-08-28
Supplement: 1471-2164-10-406-S10.pdf [file 1471-2164-10-406-S10.pdf]

# Primers used in the Real Time PCR.

*Tbp* (NM\_001004198)

Forward: tgcacaggagccaagagtga

Reverse: agcccagcttctgcacaact

*Tgfb3* (NM\_013174)

Forward: caggcccttgcccttacc

Reverse: tcagggtgtgtatagtccaagca

*Fgf13* (NM\_053428)

Forward: tctcccgatccggaagtg

Reverse: ggattgcctccattcagtacac

*Xbp1* (NM\_001004210)

Forward: tcctgggaggacacttttc

Reverse: tgggggtggctttagacact

*Usag-1* (NM\_153737)

Forward: agcccgggtggcattttc

Reverse: gctggcattccactccaaga

*Tspan8* (NM\_133526)

Forward: tgcagttgggtccatcatca

Reverse: agcatgcagcgactttctttc

*Sel1h* (NM\_177933)

Forward: ttgatgtagggtctctggatggt

Reverse: tctaagcagcttctgggattcaac

*Rkip* (NM\_017236)

Forward: acttctggtggtcaacatgaa

Reverse: tccggagcccacgtattc

*Insulin2* (NM\_019130)

Forward: ttgtggttctcacttggtggaa

Reverse: cacttgtgggtcctccacttc

*Amylase* (NM\_031502)

Forward: cattttccaagaggcattgatctt

Reverse: tcacgggccatttcc

*Nupr1* (NM\_053611)

Forward: gcctggcgctgagacaga

Reverse: ccaaggtcctgtatccattgct
